# Supplementary material
Source: Springer Nature journal article supplement (https://www.springermedizin.de/resource/supplementary/12931_2012_1371_MOESM4_ESM.pdf/9426106)

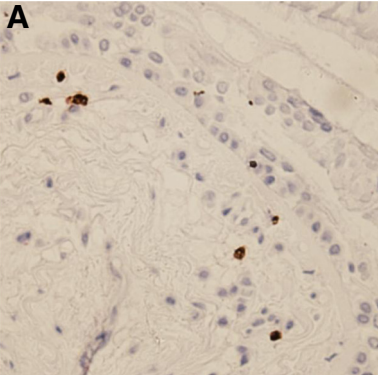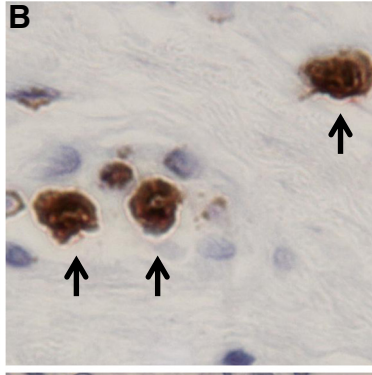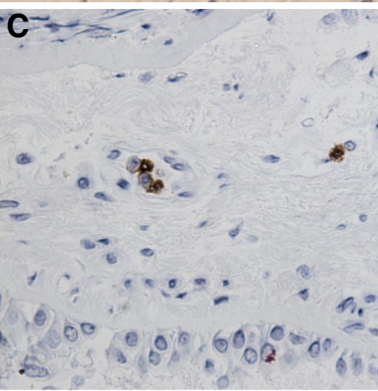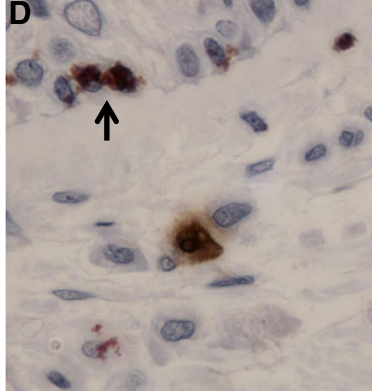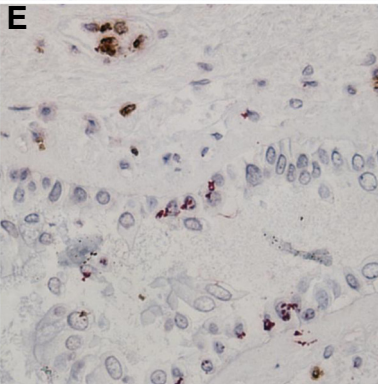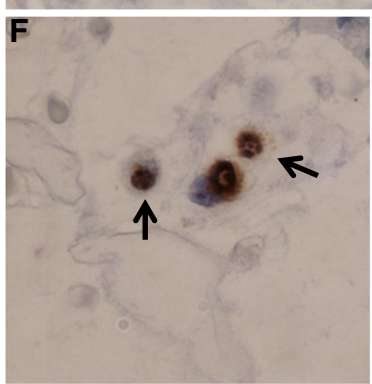

Supplement: MOESM4 [file 9426106]
